# Supplementary material for: Development of Melanoma and Other Nonkeratinocyte Skin Cancers After Thyroid Cancer Radiation
Source: PubMed Central journal article supplement (PMC11413709; doi:10.1001/jamanetworkopen.2024.34841), 2024-09-19
Supplement: jamanetwopen-e2434841-s001.pdf [file jamanetwopen-e2434841-s001.pdf]

## Supplemental Online Content

Rezaei SJ, Chen ML, Kim J, John EM, Sunwoo JB, Linos E. The development of melanoma and other nonkeratinocyte skin cancers after thyroid cancer radiation. *JAMA Netw Open*. 2024;7(9):e2434841. doi:10.1001/jamanetworkopen.2024.34841

### **eMethods.**

**eTable.** Other Nonkeratinocyte Skin Cancer Subtypes After Primary Thyroid Cancer, Diagnosed From 2000 to 2020

This supplemental material has been provided by the authors to give readers additional information about their work.

## eMethods

The Multiple Primary-Standardized Incidence Ratios (MP-SIR) session was used to conduct the statistical analysis using SEER\*Stat software (version 8.4.3, Surveillance Research Program, National Cancer Institute, Bethesda, MD, USA). Statistical significance was determined by a p-value <0.05. Radiation treatment that was listed as radioisotope in SEER was considered radioactive iodine therapy. Cancer diagnoses were identified using the International Classification of Diseases for Oncology, third edition (ICD-O-3) Site Recode/ World Health Organization (WHO) 2008 Definition. The analysis was performed January 2024 to April 2024. The Stanford IRB deemed this study exempt from review due to the use of only deidentified data. Subtypes included in our study are as follows:

### **eTable. Other Nonkeratinocyte Skin Cancer Subtypes After Primary Thyroid Cancer, Diagnosed From 2000 to 2020** ICD-O-3 code

---

|                                                                    |
|--------------------------------------------------------------------|
| 8247/3: Merkel cell carcinoma                                      |
| 8410/3: Sebaceous adenocarcinoma                                   |
| 8832/3: Dermatofibrosarcoma, NOS                                   |
| 8413/3: Eccrine adenocarcinoma                                     |
| 8200/3: Adenoid cystic carcinoma                                   |
| 8402/3: Nodular hidradenoma, malignant                             |
| 8800/3: Sarcoma, NOS                                               |
| 8390/3: Skin appendage carcinoma                                   |
| 8480/3: Mucinous adenocarcinoma                                    |
| 8542/3: Paget disease, extramammary (except Paget disease of bone) |
| 8890/3: Leiomyosarcoma, NOS                                        |
| 8255/3: Adenocarcinoma with mixed subtypes                         |
| 8407/3: Sclerosing sweat duct carcinoma                            |
| 8430/3: Mucoepidermoid carcinoma                                   |
| 8830/3: Malignant fibrous histiocytoma                             |
| 8833/3: Pigmented dermatofibrosarcoma protuberans                  |
| 9120/3: Hemangiosarcoma                                            |

---
