# Supplementary material for: Development of Melanoma and Other Nonkeratinocyte Skin Cancers After Thyroid Cancer Radiation
Source: PubMed Central journal article supplement (PMC11413709; doi:10.1001/jamanetworkopen.2024.34841), 2024-09-19
Supplement: jamanetwopen-e2434841-s002.pdf [file jamanetwopen-e2434841-s002.pdf]

## Data Sharing Statement

Rezaei. The Development of Melanoma and Other Nonkeratinocyte Skin Cancers After Thyroid Cancer Radiation. *JAMA Netw Open*. Published September 19, 2024.

doi:10.1001/jamanetworkopen.2024.34841

### Data

**Data available:** No

### Additional Information

**Explanation for why data not available:** This article uses a publicly available data source, the CDC's SEER registry, for the analysis
